# Supplementary material for: Targeting the PI3K/Akt/mTOR signalling pathway in Cystic Fibrosis
Source: PubMed Central journal article supplement (PMC5550428; doi:10.1038/s41598-017-06588-z), 2017-08-09

## **Targeting the PI3K/Akt/mTOR signalling pathway in Cystic Fibrosis**

Reilly, R Mroz, MS Dempsey, E Wynne, K Keely, SJ McKone, EF Behl, C Hiebel, C Coppinger, JA

### **Supplementary Materials**

All antibodies and inhibitors and their sources are listed in Supplementary Materials. All buffer compositions for CO-PIT, STAGE clean up, Immunoblotting, Immunofluorescence, LC-MS/MS and Short Circuit Analysis are also listed in table format (Tables 1.1-1.5)

### **Supplementary Table S1**

Mass spectrometry analysis of the  $\Delta$ F508 CFTR Interactome. The gene accession numbers, protein names, protein classes GO functions, score, and peptide numbers are displayed.

### **Supplementary Table S2**

Mass spectrometry analysis of the WT CFTR Interactome. The gene accession numbers, protein names, protein classes GO functions, score, and peptide numbers are displayed.

### **Supplementary Table S3**

Selected inhibitors to the PI3K/Akt/mTOR are listed along with their molecular target and references.

### **Supplementary Figure S1**

RICTOR was immunoprecipitated from HBE41o- and CFBE41o- cells expressing WT and  $\Delta$ F508 CFTR and the resulting RICTOR immunocomplexes were subjected to mass spectrometry analysis. The gene name, protein name and number of peptides identified of RICTOR and eight interactors are displayed in the table.

### **Supplementary Figure S2**

$\Delta$ F508 CFBE41o- cells (37°C) were treated with increasing concentrations of AZD-8055, KU-0063794, AKT-VIII and MK-2206 and protein expression for CFTR was determined by immunoblotting.

### **Supplementary Figure S3**

Subcellular localization of CFTR in  $\Delta$ F508 CFBE41o- cells treated with MK-2206, KU-0063794 was detected by confocal microscopy.

### **Supplementary Figure S4**

Co-localization of CFTR and LC3 in WT HBE41o- cells

## **Supplementary Figure S5**

Co-localization of CFTR and aggresomes was investigated by confocal microscopy in  $\Delta$ F508 CFBE cells treated with MK-2206.

### **Supplementary Materials**

**ABCAM:** BAG3 antibody (ab86298)

**Cell Signalling:** mTOR (2983 P), mTOR ser2448 (5536 P), mTOR ser2481 (2974 P), total p70s6 kinase, p70s6 kinase thr389 (9234 P), total Akt, pAkt ser473 (9271 S), RICTOR (2114 P), RAPTOR (2280 P), G $\beta$ 1 (3274 P), Autophagy Antibody Sampler Kit #4445 containing: ATG3, ATG5, ATG12, Beclin-1, ATG16L and ATG7. HSP90 (4877 P), HSP70 (4872 P), Sin1 (12860 S) and anti-rabbit HRP (7074 P2).

**Chemdea:** AZD-8055 (CD0348)

**GIBCO:** Penicillin Streptomycin (15070), Foetal bovine serum (10270-106)

**MERCK:** Rapamycin (553210-100UG)

**MERCK MILLIPORE:** CFTR antibody M3A7 (05-583)

**Nanotools:** LC3 antibody (0231-100/LC3-5F10)

**Santa Cruz:** goat anti-mouse HRP (sc-2005), MAPKAP1 antibody (sc-393166)

**Selleck Chemicals:** MK-2206 (S1078), VX-770 (S1144), VX-809 (S1565)

**Sigma Aldrich:** Ly-294002 (L9908), AKT-VIII (A6730), genistein (G6649), CFTR (inh) 172 (C2992), Forskolin (F3917)

**Thermo fisher scientific:** Minimum essential medium with L-glutamine (31095-029), goat anti-mouse Alexa Fluor® 594 (A-11005), anti-rabbit Alexa Fluor® 488 (A 11034)

**TORCIS:** KU-0063794 (3725), PP 242 (4257), 10-DEBC (2558)

**UNC Chapel Hill:** CFTR 660 antibody, CFTR 596 antibody

## **Buffer Composition**

### **Co-PIT**

| <b>Solutions</b>                                    | <b>Reagent Composition</b>                                                                    |
|-----------------------------------------------------|-----------------------------------------------------------------------------------------------|
| Dynabeads                                           | 200 ul per IP                                                                                 |
| Crosslinking buffer                                 | 0.2 M (1.52 ml)<br>triethanolamine in 50 ml PBS<br>pH 8.2                                     |
| Crosslinking buffer: Dimethyl<br>pimelimidate (DMP) | 0.2 M (1.52 ml)<br>triethanolamine, 0.025 M DMP<br>in 50 ml PBS pH 8.2                        |
| Quenching/blocking buffer                           | 0.2 M (610 µl) ethanolamine in<br>50 ml PBS, pH 8.2                                           |
| Antibody Elution buffer                             | 1 M (3.75 g) glycine in 50 ml<br>H <sub>2</sub> O pH 2.5                                      |
| Lysis buffer                                        | 1% (500 µl) Surfact-Amps®<br>NP-40, protease and<br>phosphatase inhibitor mix in 50<br>ml PBS |
| Protein complex elution buffer                      | 8 M (4.8 g) urea, 0.5 % (100<br>µl) Surfact-Amps® NP-40 in<br>10 ml PBS                       |

***Table 1.1: Solutions used in Immunoprecipitation.***

**Stop and Go protocol; protein digest clean-up (STAGE)**

| <b>Solutions</b> | <b>Reagent composition</b>                                                                     |
|------------------|------------------------------------------------------------------------------------------------|
| Buffer A         | 0.1 % 20 $\mu$ l trifluoroacetic acid (TFA) in 19.9 ml ddH <sub>2</sub> O                      |
| Buffer B         | 50 % 10 ml acetonitrile, 0.1 % 20 $\mu$ l trifluoroacetic acid, 50 % 9.9 ml ddH <sub>2</sub> O |
| Buffer C         | 1 % 200 $\mu$ l trifluoroacetic acid in 19.98 ml ddH <sub>2</sub> O                            |

***Table 1.2 Solutions used in STAGE protocol.***

***LC-MS/MS Buffers***

| <b>Solutions</b> | <b>Reagent composition</b>                                   |
|------------------|--------------------------------------------------------------|
| Buffer A         | Buffer A: 97 % water, 2.5 % acetonitrile, 0.5 % acetic acid  |
| Buffer B         | Buffer B: 97 % acetonitrile, 2.5 % water, 0.5 % acetic acid. |

### **Immunoblotting**

| <b>Solutions</b>                         | <b>Reagent composition</b>                                                                             |
|------------------------------------------|--------------------------------------------------------------------------------------------------------|
| Lysis buffer                             | 1 % SDS protease and phosphatase inhibitor mix                                                         |
| Running buffer                           | 0.025 M (3.03 g) Tris base, 0.192 M (14.04 g) glycine, 0.1 % (1 g) SDS, pH 8.5 in 1 L H <sub>2</sub> O |
| Transfer buffer                          | 0.025 M (6.06 g) Tris base, 0.192 M (28.8 g) glycine, 30 % methanol in 2 L H <sub>2</sub> O            |
| 10X Tris-buffered saline (TBS)           | 0.171 M (12.1 g) Tris, 1.44 M (42 g) NaCl in 500 ml H <sub>2</sub> O                                   |
| 1x Tris-buffered saline tween@20 (TBS-T) | 100 ml of 10 X TBS, 0.1 % Tween@20 in 900 ml H <sub>2</sub> O                                          |
| 5x SDS sample buffer                     | 50 mM Tris, 4 % w/v SDS, 20 % glycerol, 10 % v/v β-mercaptoethanol, 0.02 % w/v bromophenol blue        |
| Protein stain                            | 0.1 % w/v ponceau s stain in 10 % acetic acid                                                          |

***Table 1.3: Solutions used in immunoblotting protocol.***

### Immunofluorescence

| Solutions                  | Reagent composition                            |
|----------------------------|------------------------------------------------|
| Fix solution               | 0.45 g of PFA, 200 $\mu$ l 1 M NaOH, 15 ml PBS |
| Blocking buffer            | 2 g BSA, 100 $\mu$ l triton X-100, 50 ml PBS   |
| Antibody dilution solution | 0.5 g BSA, 100 $\mu$ l triton X-100, 15 ml PBS |

**Table 1.4: Solutions used in immunofluorescence protocol.**

### Short circuit current analysis

| Reagent                         | Concentration (mM) | Location in chamber |
|---------------------------------|--------------------|---------------------|
| NaCl                            | 120                | Basolateral         |
| NaHCO <sub>3</sub>              | 25                 | Bilateral           |
| KH <sub>2</sub> PO <sub>4</sub> | 3.3                | Bilateral           |
| K <sub>2</sub> HPO <sub>4</sub> | 0.8                | Bilateral           |
| MgCl <sub>2</sub>               | 1.2                | Bilateral           |
| CaCl <sub>2</sub>               | 1.2                | Bilateral           |
| Glucose                         | 10                 | Bilateral           |
| Na gluconate                    | 120                | Apical              |

Supplementary Table1 & 2- Attached as Excel Files

Supplementary Table 3

| Compound        | Primary Target                                                                      | Source            | Reference                                                                                                                                                                                                                                    |
|-----------------|-------------------------------------------------------------------------------------|-------------------|----------------------------------------------------------------------------------------------------------------------------------------------------------------------------------------------------------------------------------------------|
| Rapamycin       | Binds to FKBP12 and complex prevents TOR phosphorylation                            | Calbiochem, Merck | Heitman <i>et al</i> (1991) Targets for cell cycle arrest by the immunosuppressant rapamycin in yeast. <i>Science</i> 23 Aug 1991: Vol. 253, Issue 5022, pp. 905-909                                                                         |
| Ku-0063794      | Inhibits mTORC1 and mTORC2, inhibits activation of Akt, S6K and SGK.                | Tocris            | Garcia-Martinez <i>et al</i> (2009) Ku-0063794 is a specific inhibitor of the mammalian target of rapamycin (mTOR). <i>Biochem.J.</i> 421 29.                                                                                                |
| PP242           | ATP competitive mTORC1 and mTORC2 inhibitor.                                        | Tocris            | Feldman <i>et al</i> (2009) Active-Site Inhibitors of mTOR Target Rapamycin-Resistant Outputs of mTORC1 and mTORC2. <i>PLoS Biol.</i> 2009 Feb 10;7(2):e38.                                                                                  |
| AZD8055         | ATP competitive mTORC1 and mTORC2 inhibitor.                                        | Chemdea           | Chresta <i>et al</i> (2010) AZD8055 Is a Potent, Selective, and Orally Bioavailable ATP-Competitive Mammalian Target of Rapamycin Kinase Inhibitor with In vitro and In vivo Antitumor Activity. <i>Cancer Res.</i> 2010 Jan 1;70(1):288-98. |
| 10-DEBC         | Akt with downstream effects on mTOR and S6K.                                        | Tocris            | Thimmaiah <i>et al</i> (2005) Identification of <i>N</i> <sup>10</sup> -substituted phenoxazines as potent and specific inhibitors of Akt signaling. <i>J.Biol.Chem.</i> (2005) 36 31924                                                     |
| Ly-294002       | Phosphoinositide 3-kinase inhibitor. Targets mTOR via ATP binding site.             | Sigma Aldrich     | Chris J. Vlahos <i>et al</i> (1994) A specific inhibitor of phosphatidylinositol 3-kinase, 2-(4-morpholinyl)-8-phenyl-4H-1-benzopyran-4-one(LY294002). <i>Biol Chem.</i> 1994 Feb 18;269(7):5241-8.                                          |
| MK2206          | Allosteric Akt inhibitor by stopping autophosphorylation of Akt at T308 and Ser473. | Selleck Chemicals | Hirai <i>et al</i> (2010) MK-2206, an Allosteric Akt Inhibitor, Enhances Antitumor Efficacy by Standard Chemotherapeutic Agents or Molecular Targeted Drugs <i>In vitro</i> and <i>In vivo</i> . <i>Mol Cancer Ther</i> July 2010 9; 1965    |
| AKTVIII, AKT1/2 | Allosteric Akt inhibitor by binding PH domain.                                      | Sigma Aldrich     | Wu <i>et al</i> (2010) Crystal Structure of Human AKT1 with an Allosteric Inhibitor Reveals a New Mode of Kinase Inhibition. <i>PLoS One.</i> 2010; 5(9): e12913.                                                                            |

Supplementary Figure S1

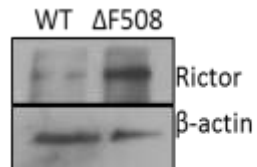

| GENE NAME   | Protein Name                                        | WT Rictor IP Peptide No. | $\Delta$ F508 Rictor Peptide No. |
|-------------|-----------------------------------------------------|--------------------------|----------------------------------|
| RICTR-HUMAN | Rapamycin Insensitive companion of mTOR             | 15                       | 25                               |
| MTOR_HUMAN  | Serine/threonine-protein kinase mTOR                | 1                        | 1                                |
| SIN 1_HUMAN | Target of rapamycin complex 2 subunit MAPKAP        | 2                        | 6                                |
| CFTR_HUMAN  | Cystic fibrosis transmembrane conductance regulator | 0                        | 0                                |
| HS90B_HUMAN | Heat Shock Protein Hsp90beta                        | 5                        | 6                                |
| HSP7C_HUMAN | Heat Shock Cognate 71                               | 14                       | 17                               |
| HSPB1_HUMAN | Heat Shock Beta-1                                   | 1                        | 8                                |
| BAG3_HUMAN  | BAG family molecular chaperone regulator 3          | 0                        | 1                                |
| ACTG_HUMAN  | Actin Cytoplasmic 2                                 | 30                       | 42                               |





Supplementary Figure S3

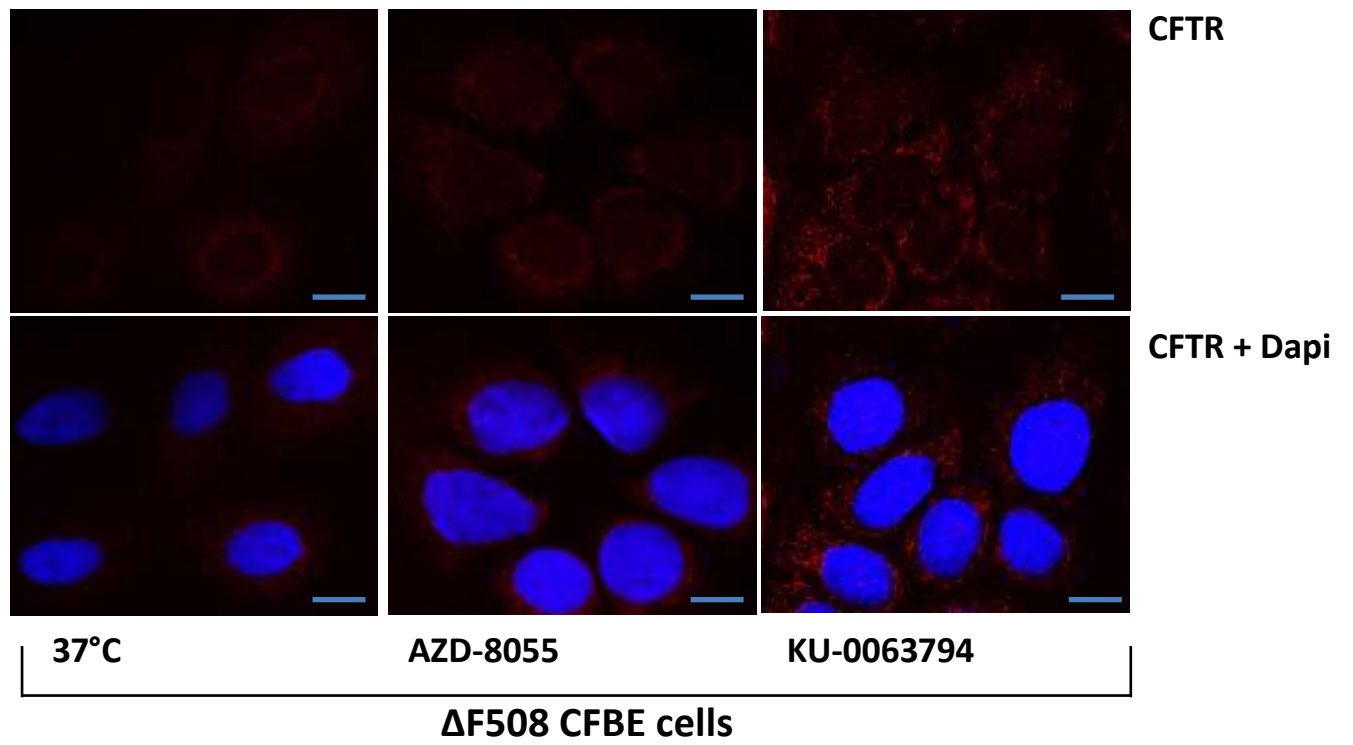

**Supplementary Figure S4**

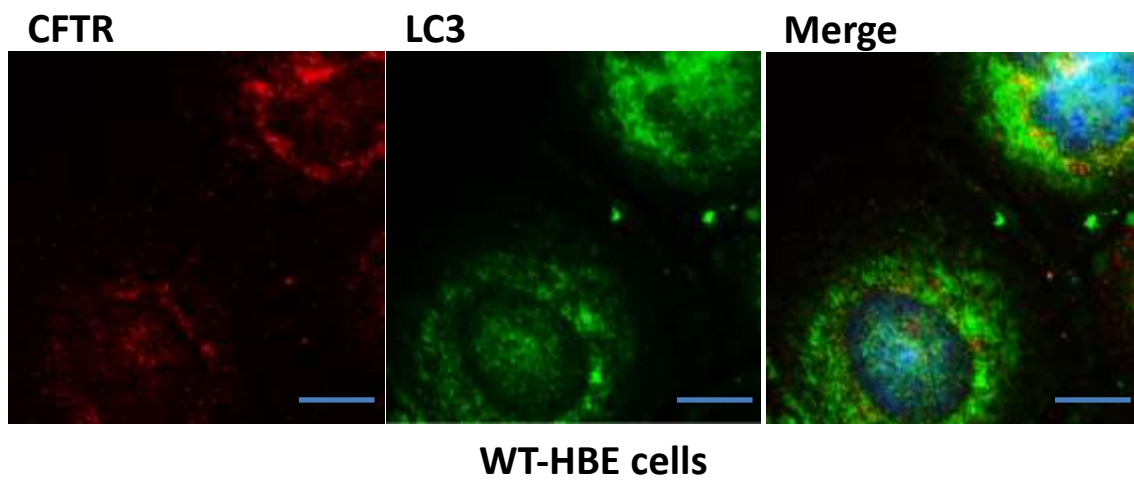

Supplementary Figure S5

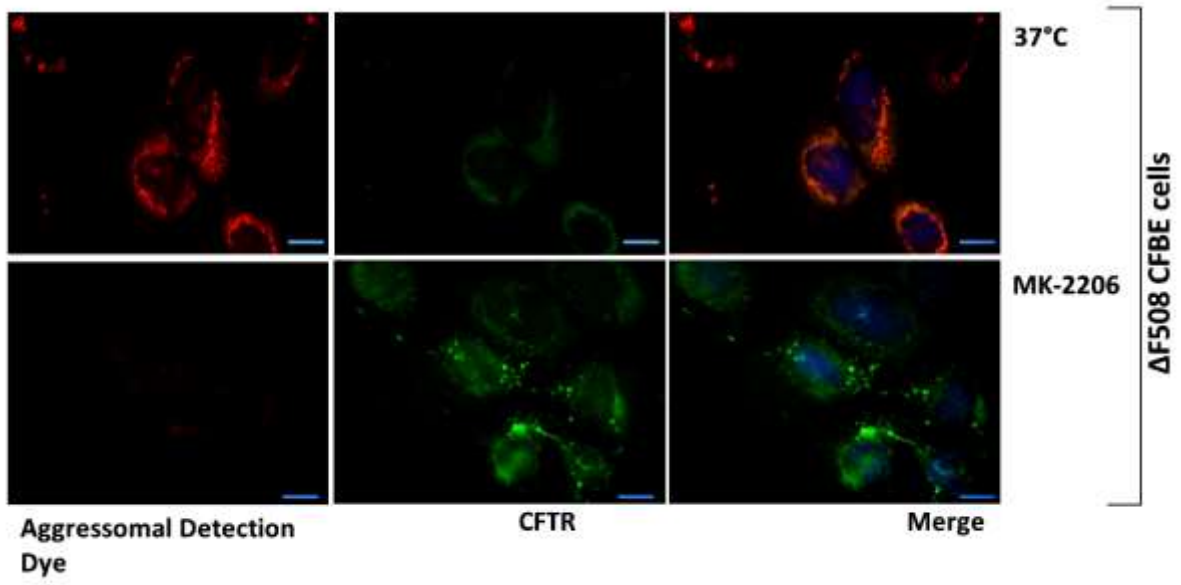

Supplement: 41598_2017_6588_MOESM1_ESM.pdf [file 41598_2017_6588_MOESM1_ESM.pdf]
